# Supplementary material for: FGF negatively regulates muscle membrane extension inCaenorhabditis elegans
Source: Oxford University Press journal article supplement (doi:10.1242/dev.02300), 2006-02-23
Supplement: dev02300-sup-dev02298figs1.pdf [file dev02300-sup-dev02298figs1.pdf]

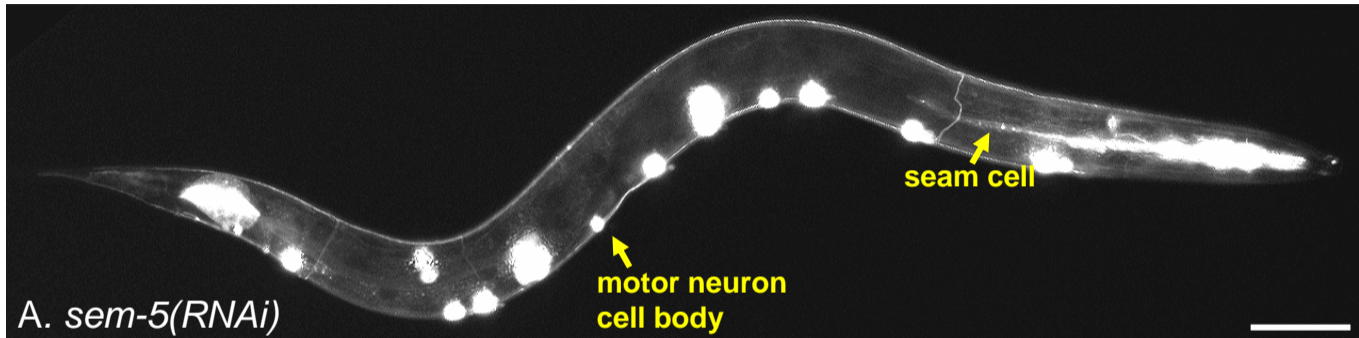

**Supplemental Figure 1.** EMEs are restricted to the BWM, not being seen in other cells such as the hypodermal seam cells or the cell bodies of ventral cord DA and DB motor neurons of *RP191 trEx[unc-129nsp::mb::yfp; myo-3p::mb::cfp]* worms in a *sem-5(RNAi)* background. The scale bar represents 50  $\mu\text{m}$ .
