# Supplementary material for: FGF negatively regulates muscle membrane extension inCaenorhabditis elegans
Source: Oxford University Press journal article supplement (doi:10.1242/dev.02300), 2006-02-23
Supplement: dev02300-sup-dev02298figs2.pdf [file dev02300-sup-dev02298figs2.pdf]

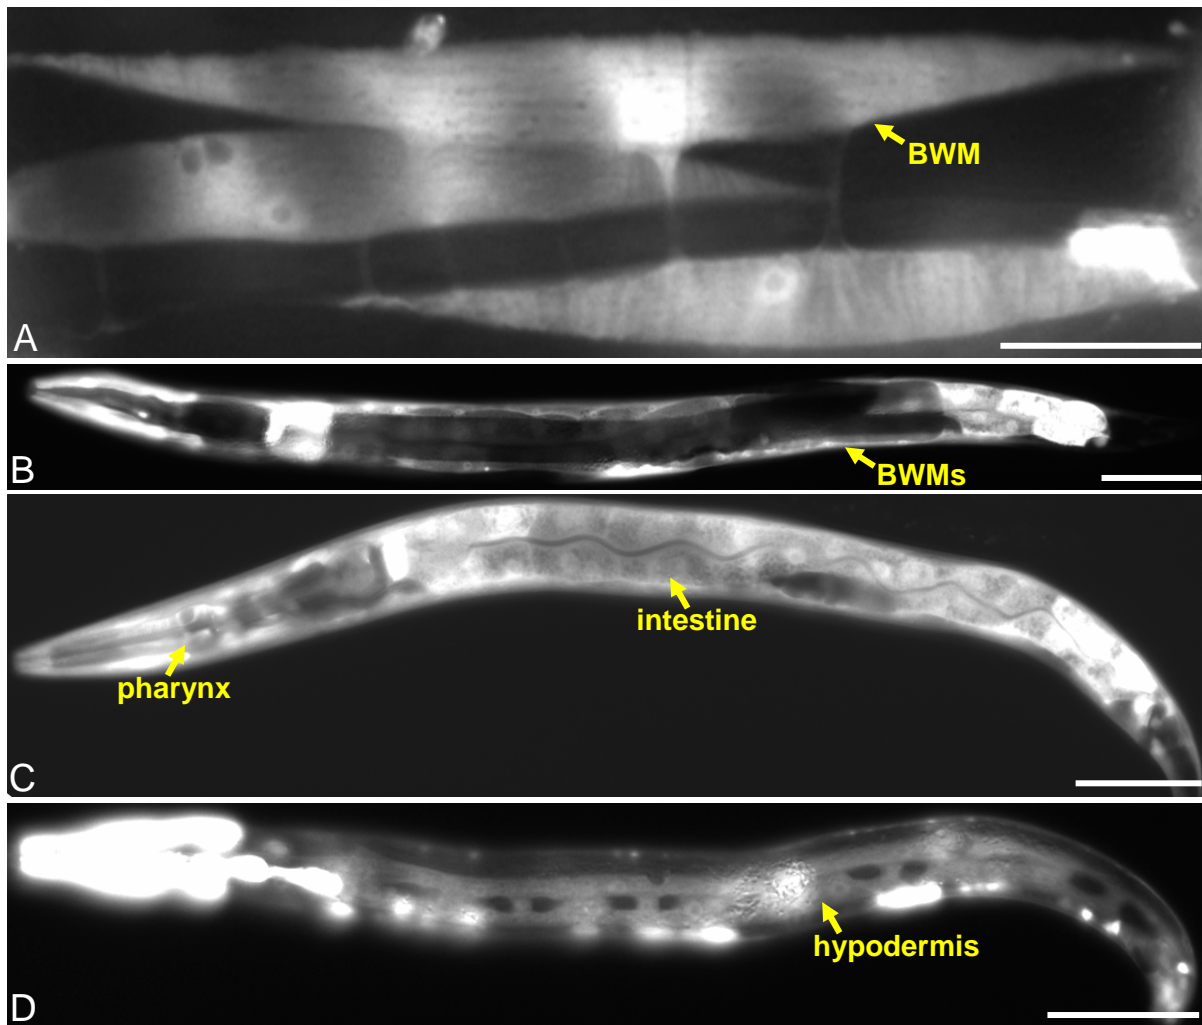

**Supplemental Figure 2.** A *sem-5* transcriptional reporter is expressed in numerous cells throughout the animal in *RP224 trEx[sem-5p::YFP]* worms. (A-D) A *sem-5* transcriptional reporter (*sem-5p::yfp*) is expressed in cells throughout the animal, including (A-B) the BWMs, (C) the intestine and pharynx and (D) the hypodermis. The scale bar represents 50  $\mu\text{m}$ .
