# Supplementary material for: FGF negatively regulates muscle membrane extension inCaenorhabditis elegans
Source: Oxford University Press journal article supplement (doi:10.1242/dev.02300), 2006-02-23
Supplement: dev02300-sup-dev02298figs3.pdf [file dev02300-sup-dev02298figs3.pdf]

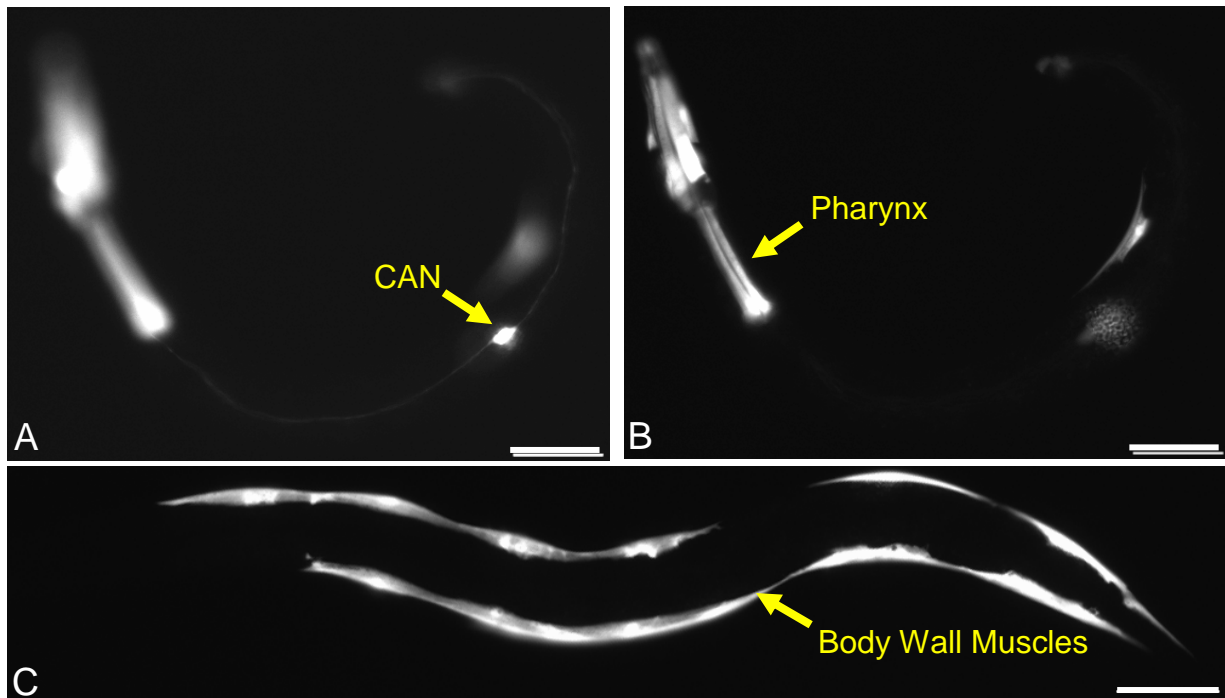

**Supplemental Figure 3.** A *let-756* transcriptional reporter is expressed in a specific cell types with *C. elegans*. (A-C) YFP expression in rescued *RP164 trEx[let-756p::*YFP*; let-756p::*LET-756*]; let-756(*s2613*) *unc-32(e189) III* animals is observed in (A) the CAN neurons, (B) the pharynx, (C) the BWMs, and possibly the G1 and G2 glandular cells (not shown). The scale bar is 50  $\mu$ m.*
